# Supplementary material for: Directional freeze-cast hybrid-backbone meso-macroporous bodies as micromonolith catalysts for gas-to-liquid processes
Source: Royal Society of Chemistry journal article supplement (doi:10.1039/c8ta07512c), 2018-01-01
Supplement: c8ta07512c1.pdf [file c8ta07512c1.pdf]

**Supplementary Information to:**

**Directional freeze-cast hybrid-backbone  
meso-macroporous bodies as  
micromonolith catalysts for gas-to-liquid  
processes**

Jonglack Kim,<sup>a, ‡</sup> Valentina Nese,<sup>a, ‡</sup> Jochen Joos,<sup>b</sup> Kai Jeske,<sup>a</sup> Nicolas  
Duyckaerts,<sup>a</sup> Norbert Pfänder,<sup>c</sup> and Gonzalo Prieto<sup>a,\*</sup>

<sup>a</sup> Max-Planck-Institut für Kohlenforschung, Kaiser-Wilhelm-Platz 1, 45470 Mülheim an der Ruhr (Germany)

<sup>b</sup> Institute for Applied Materials (IAM-WET), Karlsruhe Institute of Technology (KIT),  
Adenauerring 20b, 76131, Karlsruhe (Germany)

<sup>c</sup> Max-Planck-Institut für Chemische Energiekonversion, Stiftstraße 34-36, 45470 Mülheim an der Ruhr (Germany)

<sup>‡</sup>: These authors contributed equally to this work.

\* Email: prieto@mpi-muelheim.mpg.de

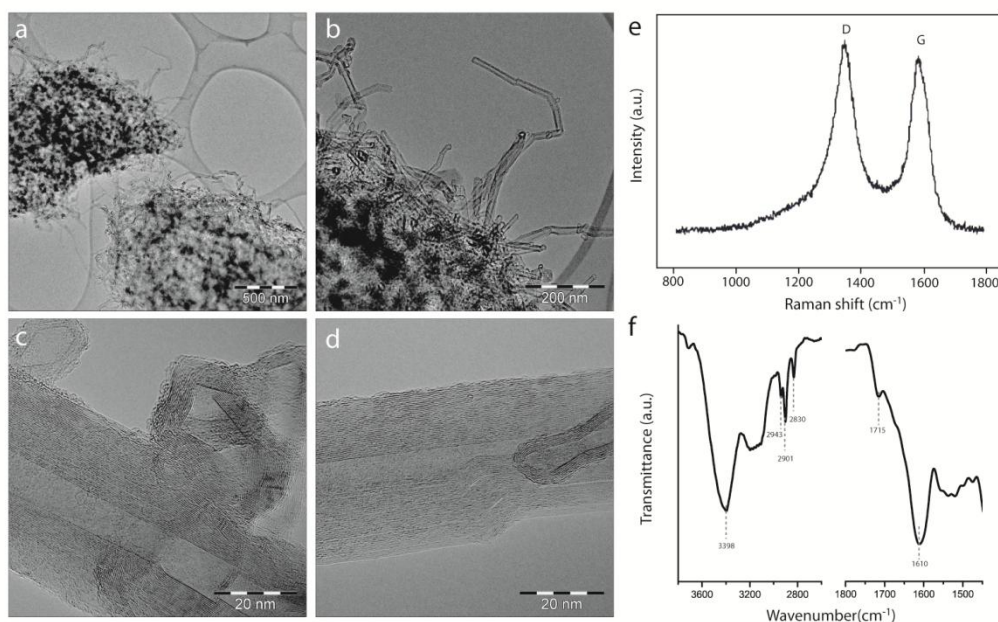

**Figure S1:** Physicochemical characterization of multiwall carbon nanotubes. a, b) Overview bright-field TEM micrographs. c,d) high-resolution bright-field TEM micrographs. e) Raman spectra. f) Fourier-Transform Infrared spectra.

(HR)TEM inspection of the carbon nanotubes clearly reveals their multiwall nature and highly developed graphitic structure. The tubes display diameters in the range of 10-40 nm and lengths of about 10-30  $\mu\text{m}$ , which are ideal to achieve a highly interlaced network as the scaffold for the monolith backbone. The Raman spectra shows well developed so-called D and G bands peaking at Raman-shifts of ca. 1345 and 1575  $\text{cm}^{-1}$ , respectively, indicative for the presence of local defects and a certain degree of structural disorder in the tubes. The FTIR spectra showed bands at 2830, 2901 and 2943  $\text{cm}^{-1}$ , corresponding to the stretching vibrations in alkyl  $\text{CH}_x$  species, likely associated to partially hydrogenated defects on the surface of the CNTs. In addition, a broad band in the region 2500-3000  $\text{cm}^{-1}$ , alongside a signal at 1715  $\text{cm}^{-1}$  can be ascribed to stretching vibrations of -OH and C=O groups in carboxylic species, confirming the surface functionalization of the nanotubes with carboxylic groups, which facilitates their suspension in the aqueous medium employed to cast the monoliths.

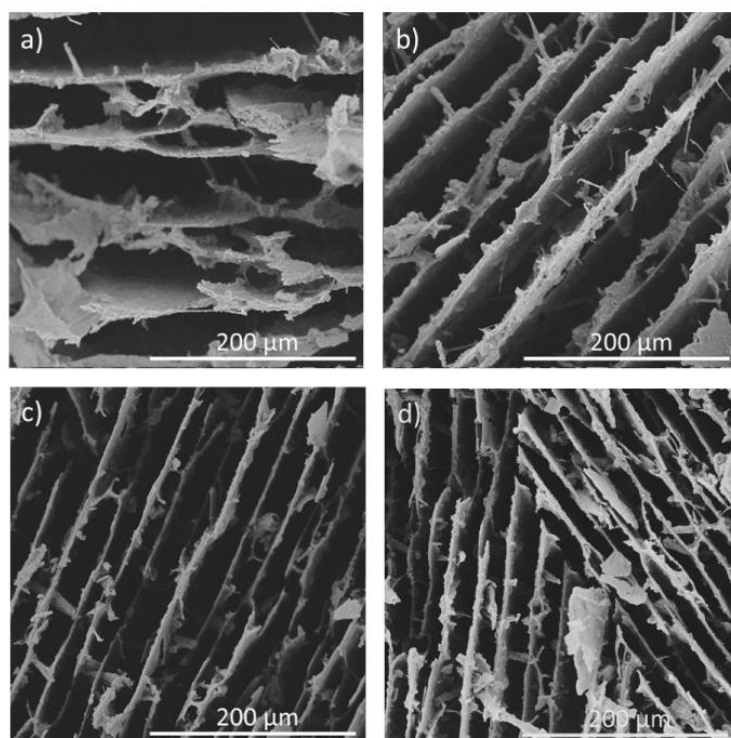

**Figure S2:** Representative cross-sectional SEM micrographs for CNT-Al<sub>2</sub>O<sub>3</sub> monoliths cast in the absence of zirconium acetate as ice growth modulator at cooling rates of a) -0.5, b) -2.0, c) -5.0 and d) -10 K min<sup>-1</sup>.

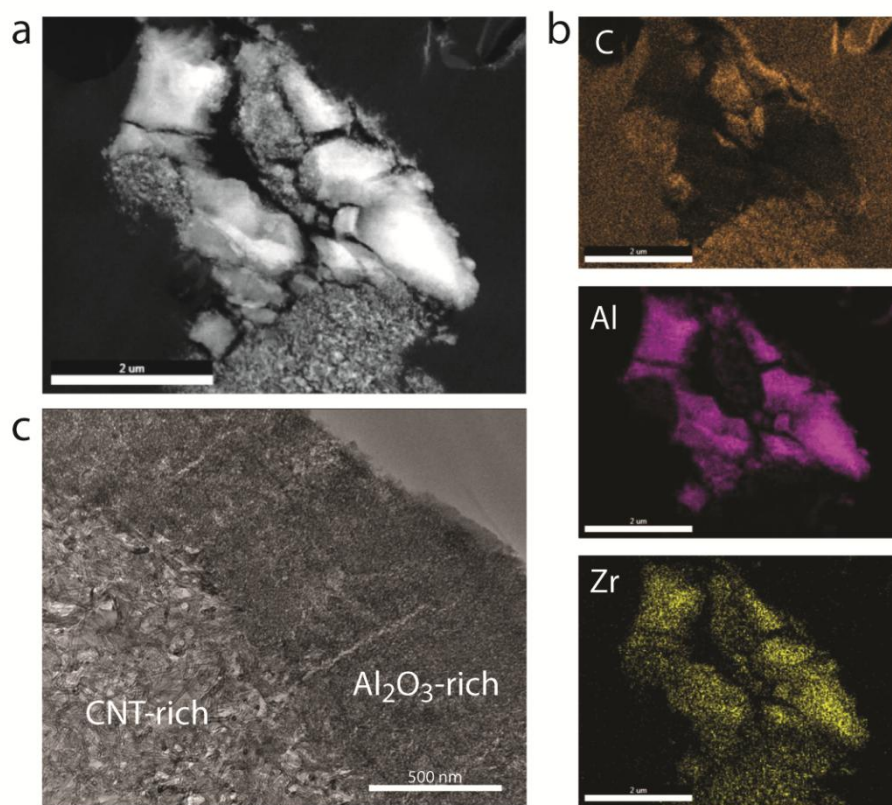

**Figure S3:** a) Representative HAADF-STEM micrograph of an ultramicrotomed cross-section (150 nm nominal thickness) of a CNT-ZrAlO<sub>x</sub> micromonolith freeze-cast from a suspension obtained by thorough wet milling of the CNT and pseudoboehmite solid precursors in water. b) EDX compositional maps of the region in panel (a) obtained from the corresponding K-spectral lines. c) Bright-field TEM micrograph showing a high magnification detail of CNT and Al<sub>2</sub>O<sub>3</sub>-rich patches, as labelled on the micrograph. Scale bars are 2 μm for panels a and b. Scale bar is 500 nm for panel c.

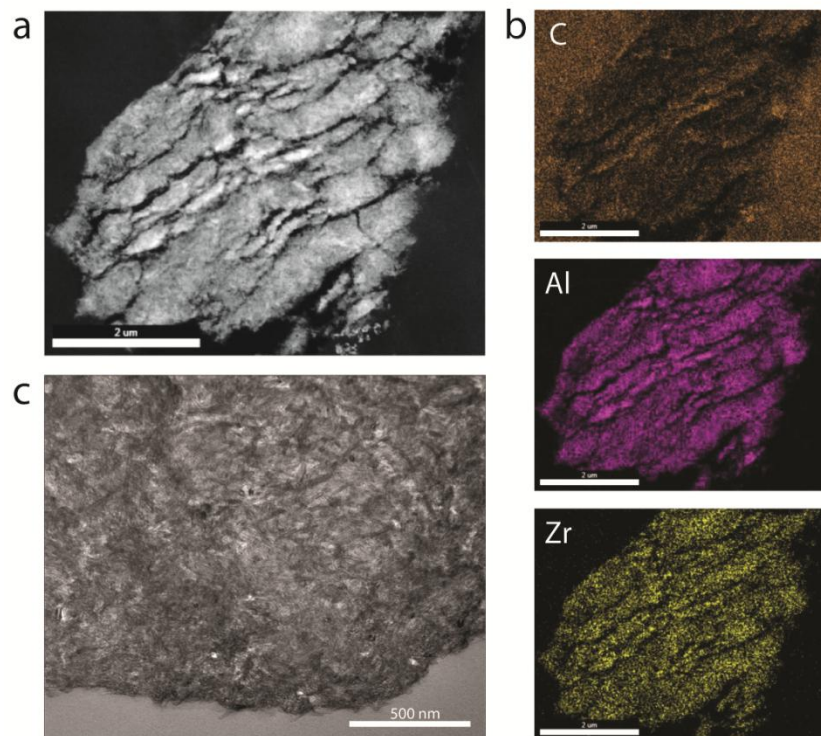

**Figure S4:** a) Representative HAADF-STEM micrograph of an ultramicrotomed cross-section (150 nm nominal thickness) of a CNT-ZrAlO<sub>x</sub> micromonolith freeze-cast from a suspension obtained by high-power ultrasonication of the CNT and pseudoboehmite solid precursors in water using a cell disruptor homogenizer. b) EDX compositional maps of the region in panel (a) obtained from the corresponding K-spectral lines. c) Bright-field TEM micrograph showing a high magnification detail of the excellent spatial intermixing between the CNT and ZrAlO<sub>x</sub> backbone components. Scale bars 2 μm for panels a and b. Scale bars 500 nm for panel c.



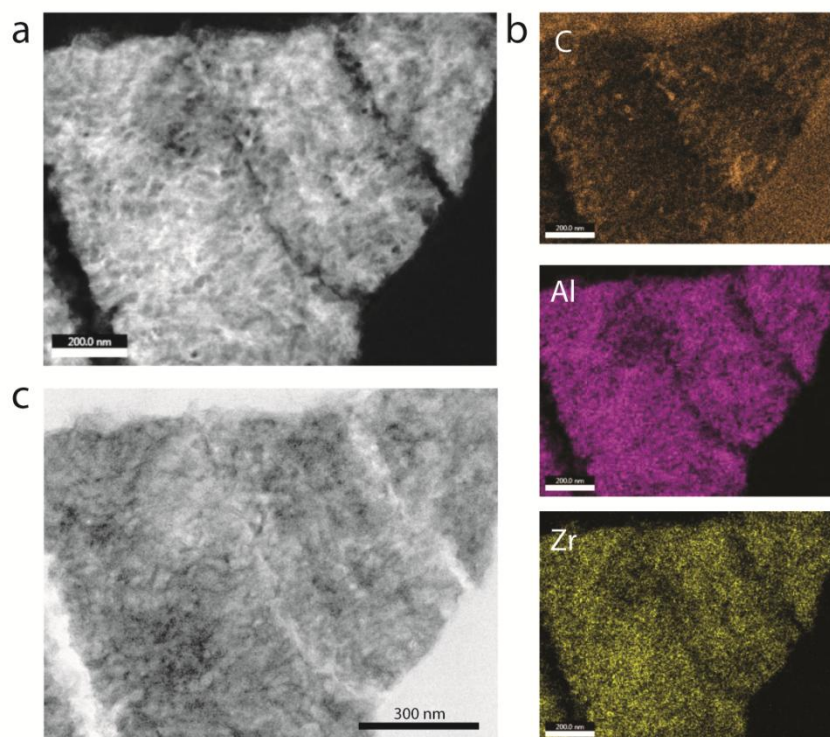

**Figure S5:** a) Representative HAADF-STEM micrograph of an ultramicrotomed cross-section (150 nm nominal thickness) of a CNT-ZrAlO<sub>x</sub> micromonolith freeze-cast from a suspension obtained by high-power ultrasonication of the CNT and pseudoboehmite solid precursors in water using a cell disruptor homogeneizer. b) EDX compositional maps of the region in panel (a) obtained from the corresponding K-spectral lines. c) Bright-field STEM micrograph showing a high magnification detail of the excellent spatial intermixing between the CNT and ZrAlO<sub>x</sub> backbone components. Scale bars 200 nm for panels a and b. Scale bars 300 nm for panel c.

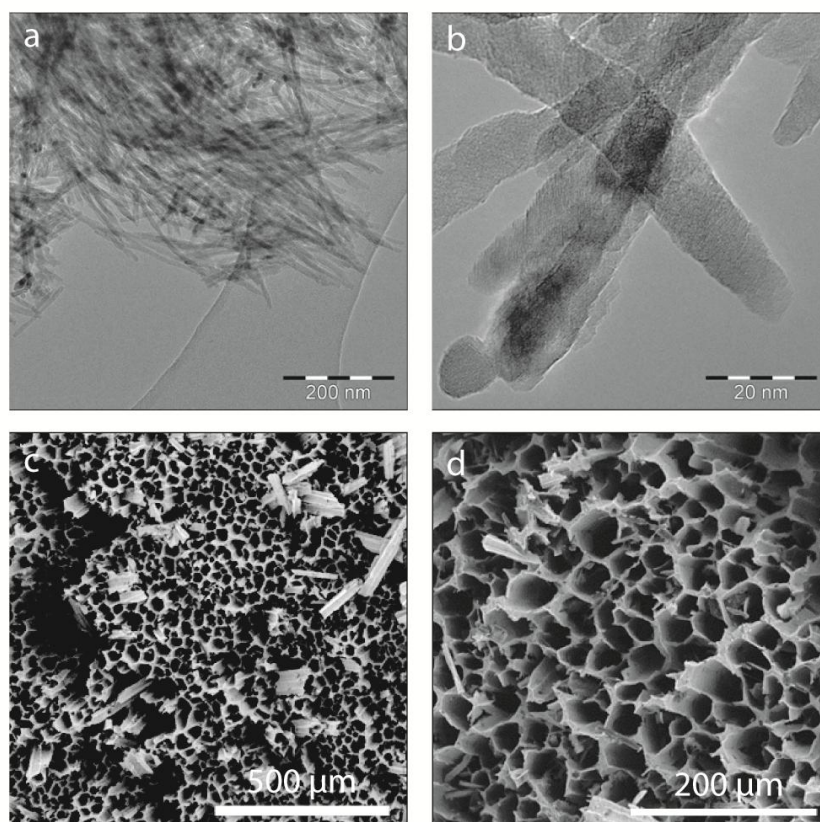

**Figure S6:** a,b) Representative bright-field TEM micrographs of Al<sub>2</sub>O<sub>3</sub> nanofibers. c,d) Cross-sectional SEM micrographs of a ZrO<sub>x</sub>-Al<sub>2</sub>O<sub>3</sub> (MN\_ZrAlO) micromonolith freeze-cast employing Al<sub>2</sub>O<sub>3</sub> nanofibers as 1D skeleton component.

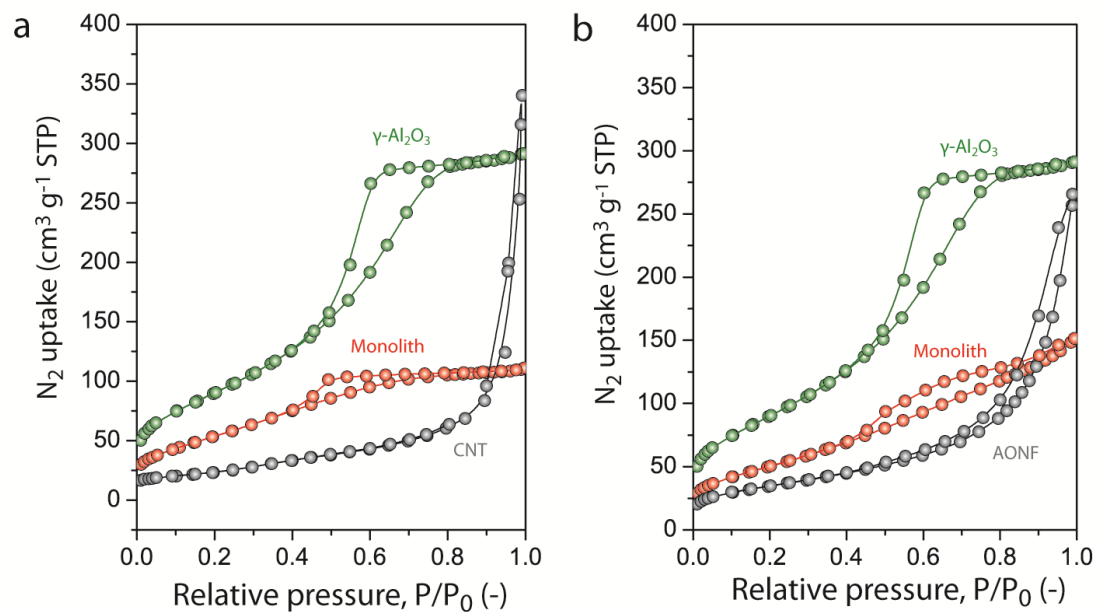

**Figure S7:** N<sub>2</sub>-physisorption isotherms, recorded at 77K, for the individual building units and the freeze-cast micromonoliths with a) a CNT-ZrAlO<sub>x</sub> backbone and b) a ZrAlO<sub>x</sub> backbone. CNT: carbon nanotubes. AONF: Alumina nanofibers.



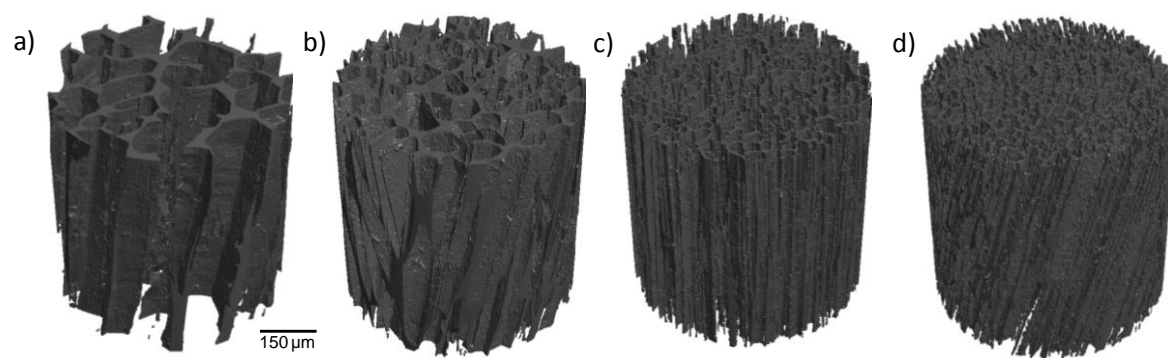

**Figure S8:** Representative 3D-rendered visualizations of reconstructed and segmented X-ray tomograms for CNT-ZrAlO<sub>x</sub> micromonoliths casted using cooling rates of a) -0.5, b) -2, c) -5 and d) -10 K min<sup>-1</sup>, respectively, obtained at a spatial resolution corresponding to a voxel size of 850 x 850 x 850 nm<sup>3</sup>.

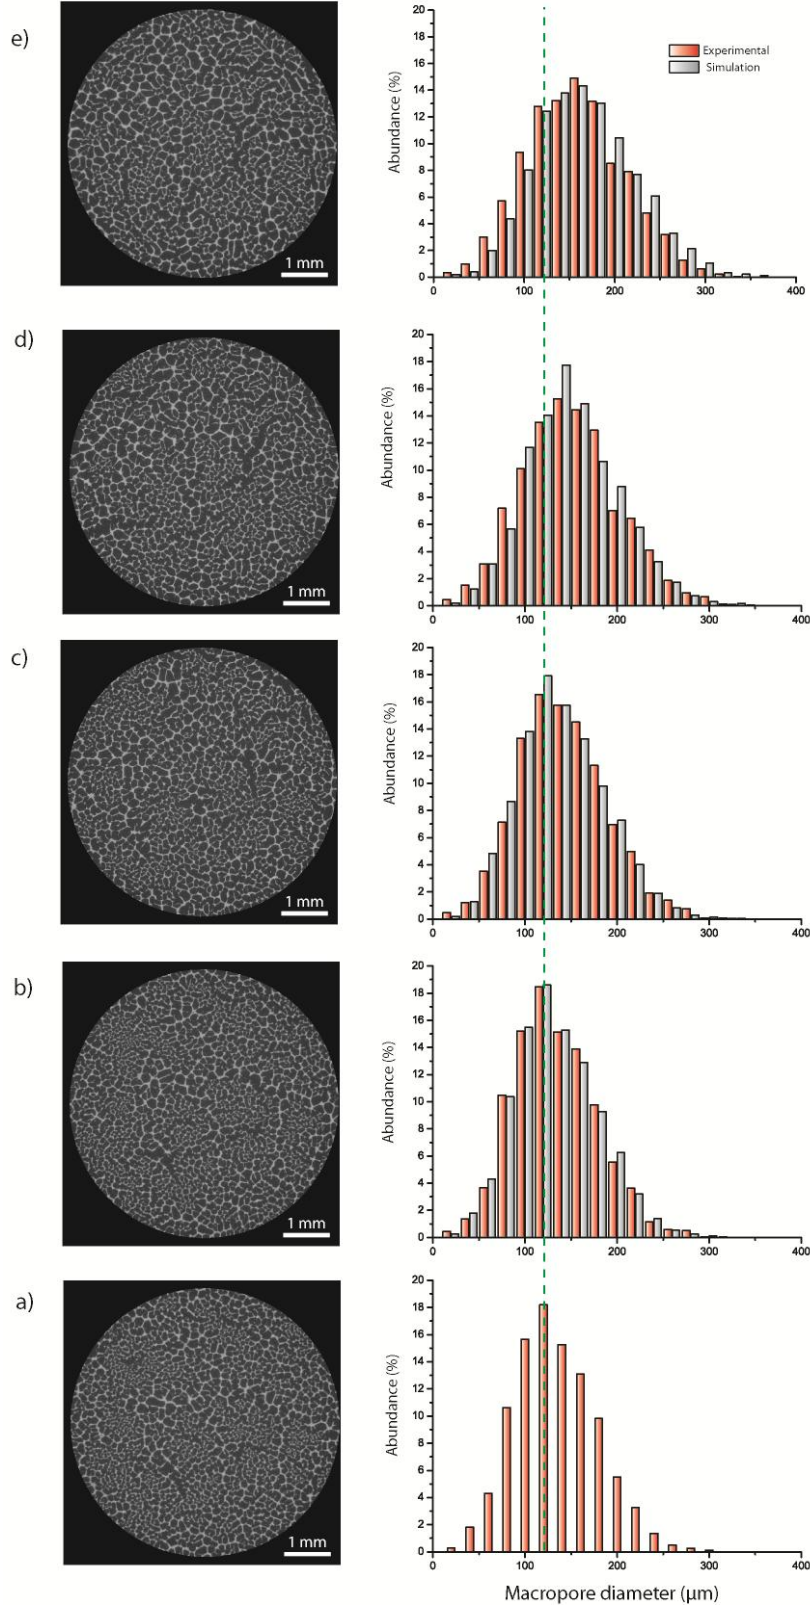

**Figure S9:** Cross-sectional X-ray tomography slices (left panels) and number-weighted macropore size distributions (right panels) registered at equidistant (600 μm distance between consecutive slices, from bottom (panel a) to top (panel e)) positions along the axial direction of a CNT-ZrAlO<sub>x</sub> micromonolith cast at a cooling rate of  $-0.5 \text{ K min}^{-1}$ , with the corresponding number-weighted macropore size distribution as derived experimentally from the reconstructed tomograms (orange bars) and predicted by a sintering simulation of ice crystal growth (gray bars) with optimal fitting parameters (see main text). The dashed line serves as guide to the eyes to visualize the right-shift observed in the macropore size distribution while moving upwards along the axial axis of the monolith body.

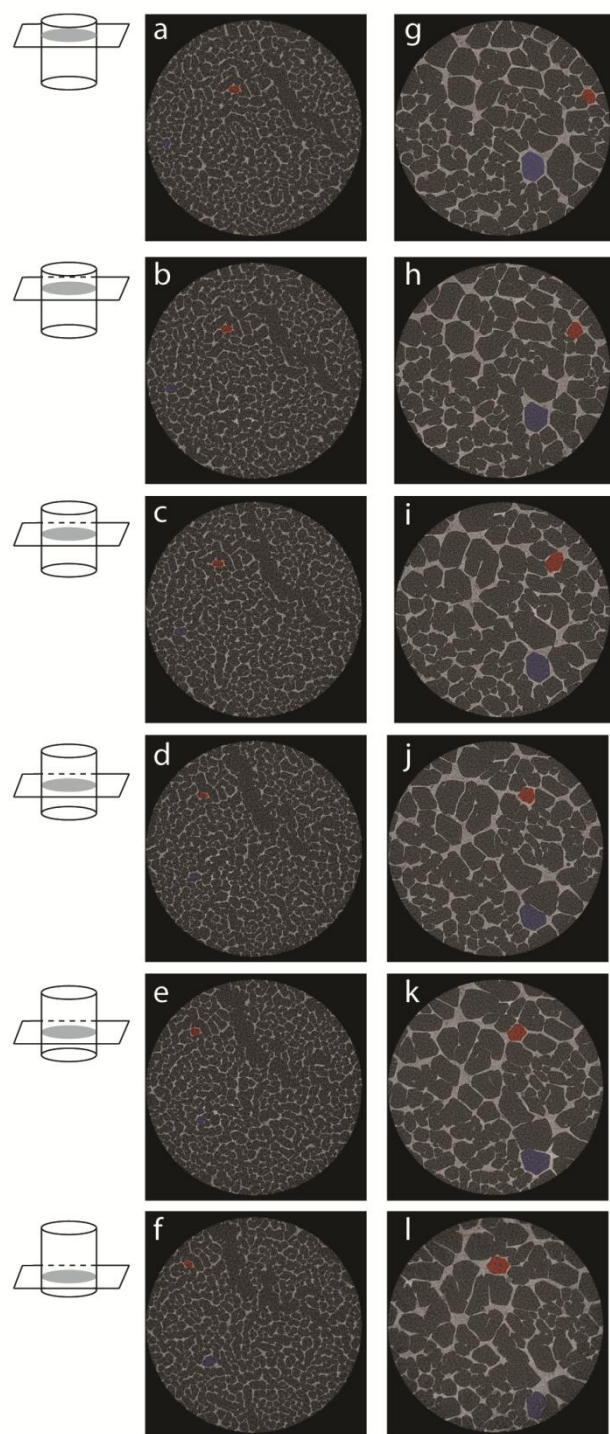

**Figure S10:** Labeled tracking of two selected macropores channels along axially-stacked X-ray tomographic slices for CNT/ZrAlO<sub>x</sub> micromonoliths freeze-cast with cooling rates of a-f) -10 K min<sup>-1</sup> and g-l) -2 K min<sup>-1</sup>.

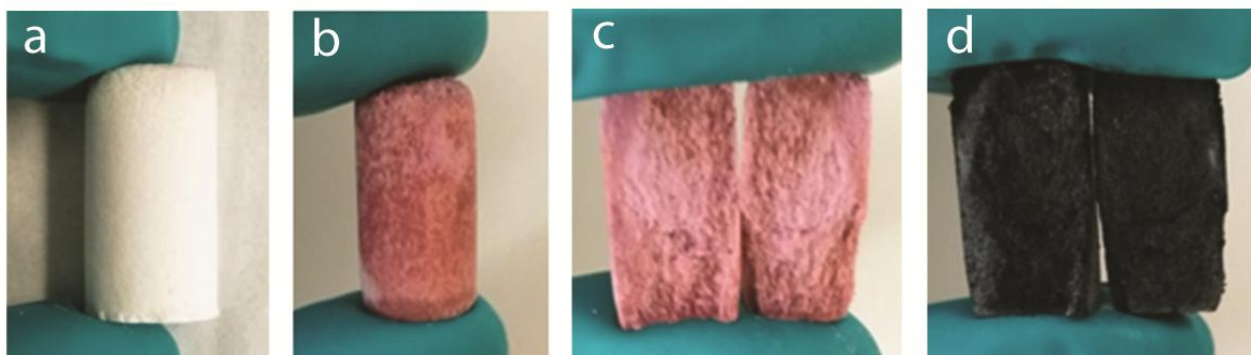

**Figure S11:** Photographs of a micromonolith body with a  $\text{ZrAlO}_x$  backbone, a) after freeze casting, freeze drying and annealing; b) after impregnation with an aqueous solution of Ru and Co nitrate precursors and drying; c) cross-sectional view after axial slicing the monolith in panel (b); after calcination for metal nitrate decomposition into oxide nanocrystals to obtain the ultimate Fischer-Tropsch catalyst (also shown after axial sectioning).

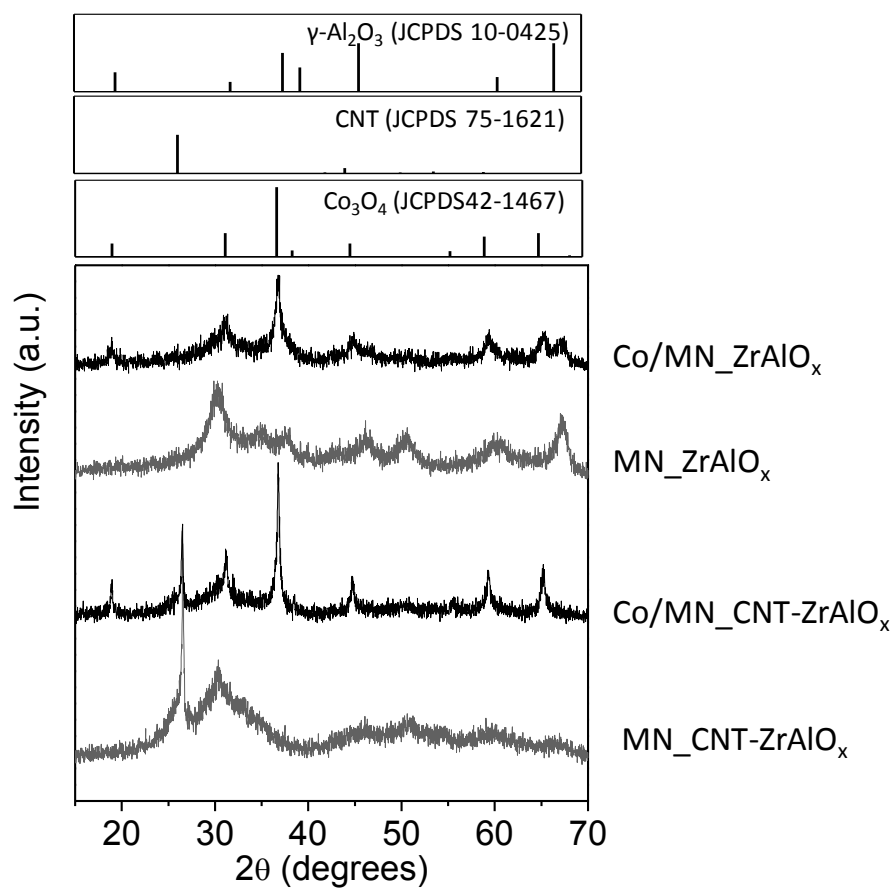

**Figure S12:** Powder-X-ray diffraction patterns for monolithic bodies with different backbone compositions (gray traces) and the corresponding cobalt-based Fischer-Tropsch catalysts in their as-calcined state (black traces). Reference patterns for selected crystalline phases identified in the samples are given on the top part of the plot.

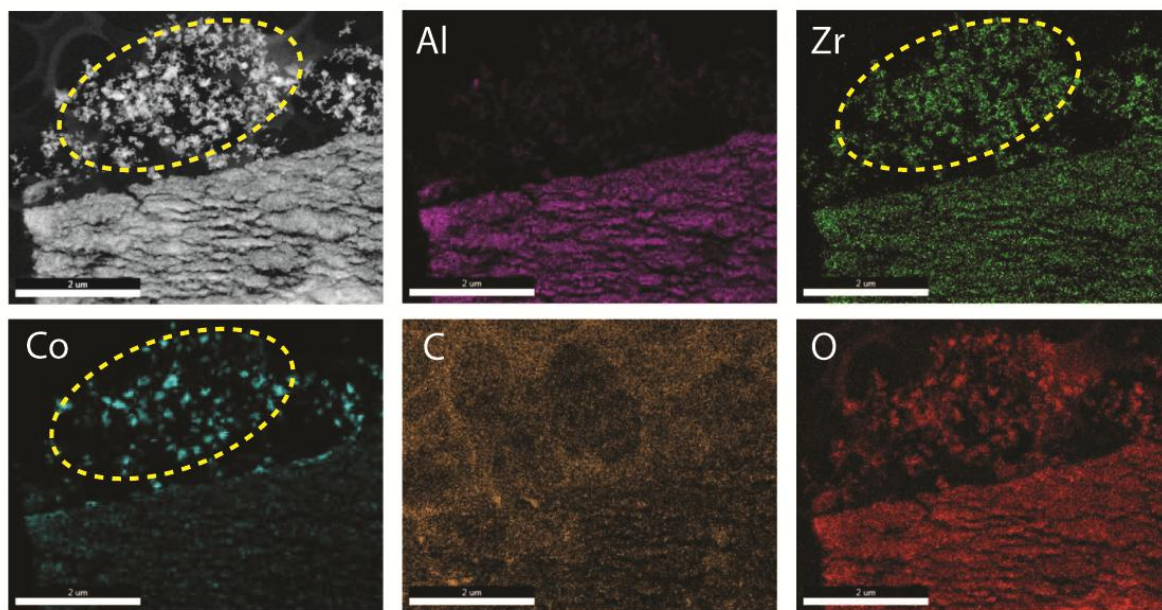

**Figure S13:** Representative HAADF-STEM micrograph (top-left panel) of an ultramicrotomed cross-section (150 nm nominal thickness) of a Co/CNT-ZrAlO<sub>x</sub> micromonolithic catalyst and EDX compositional maps of the same region obtained from the corresponding K-spectral lines.

The dashed region on the micrograph and the Co, Zr-compositional maps highlights the presence of Co<sub>3</sub>O<sub>4</sub> nanocrystals not directly confined to the mesoporous Al<sub>2</sub>O<sub>3</sub> component of the monolith backbone, but associated to ZrO<sub>x</sub> species which protrude from the Al<sub>2</sub>O<sub>3</sub>-containing monolith macropore wall and are thus not associated to Al<sub>2</sub>O<sub>3</sub> nanocrystals. These ZrO<sub>x</sub> patches might originate from Zr acetate species which remain "trapped" within the ice crystals during freeze casting, aggregate upon template removal by freeze drying and subsequent annealing treatments.
